# Supplementary material for: Effects of muscle strength training combined with neuromuscular electrical stimulation on pain, function, muscle strength, patellar stress, and muscle activation during running in people with patellofemoral pain
Source: Research Square preprint supplement (doi:10.21203/rs.3.rs-7611495/v1), 2025-10-10
Supplement: Supplementary file 1 [file 85f30858dbe3633f7f56eb81.pdf]

| Section/topic                          | No  | CONSORT 2025 checklist item description                                                                                                                                           | Reported on page no.              |
|----------------------------------------|-----|-----------------------------------------------------------------------------------------------------------------------------------------------------------------------------------|-----------------------------------|
| <b>Title and abstract</b>              |     |                                                                                                                                                                                   |                                   |
| Title and structured abstract          | 1a  | Identification as a randomised trial                                                                                                                                              | Page 1                            |
|                                        | 1b  | Structured summary of the trial design, methods, results, and conclusions                                                                                                         | Lines 1 to 23 on Page 2           |
| <b>Open science</b>                    |     |                                                                                                                                                                                   |                                   |
| Trial registration                     | 2   | Name of trial registry, identifying number (with URL) and date of registration                                                                                                    | Line 108 on Page 5                |
| Protocol and statistical analysis plan | 3   | Where the trial protocol and statistical analysis plan can be accessed9/23/2025                                                                                                   | Lines 7 to 68 on Pages 2 to 4     |
| Data sharing                           | 4   | Where and how the individual de-identified participant data (including data dictionary), statistical code and any other materials can be accessed                                 | Lines 268 to 297 on Pages 9 to 10 |
| Funding and conflicts of interest      | 5a  | Sources of funding and other support (eg, supply of drugs), and role of funders in the design, conduct, analysis and reporting of the trial                                       | Lines 647 to 649 on Page 21       |
|                                        | 5b  | Financial and other conflicts of interest of the manuscript authors                                                                                                               | Lines 644 to 645 on Page 21       |
| <b>Introduction</b>                    |     |                                                                                                                                                                                   |                                   |
| Background and rationale               | 6   | Scientific background and rationale                                                                                                                                               | Lines 29 to 68 on Pages 2 to 4    |
| Objectives                             | 7   | Specific objectives related to benefits and harms                                                                                                                                 | Lines 70 to 77 on Page 4          |
| <b>Methods</b>                         |     |                                                                                                                                                                                   |                                   |
| Patient and public involvement         | 8   | Details of patient or public involvement in the design, conduct and reporting of the trial                                                                                        | Lines 90 to 126 on Pages 4 to 5   |
| Trial design                           | 9   | Description of trial design including type of trial (eg, parallel group, crossover), allocation ratio, and framework (eg, superiority, equivalence, non-inferiority, exploratory) | Lines 111 to 166 on Pages 5 to 6  |
| Changes to trial protocol              | 10  | Important changes to the trial after it commenced including any outcomes or analyses that were not prespecified, with reason                                                      | None                              |
| Trial setting                          | 11  | Settings (eg, community, hospital) and locations (eg, countries, sites) where the trial was conducted                                                                             | Lines 102 to 106 on Page 5        |
| Eligibility criteria                   | 12a | Eligibility criteria for participants                                                                                                                                             | Lines 90 to 98 on Page 4          |
|                                        | 12b | If applicable, eligibility criteria for sites and for individuals delivering the interventions (eg, surgeons, physiotherapists)                                                   | Line 170 on Page 6                |

|                                                            |     |                                                                                                                                                                                                                                                                                 |                                   |
|------------------------------------------------------------|-----|---------------------------------------------------------------------------------------------------------------------------------------------------------------------------------------------------------------------------------------------------------------------------------|-----------------------------------|
| Intervention and comparator                                | 13  | Intervention and comparator with sufficient details to allow replication. If relevant, where additional materials describing the intervention and comparator (eg, intervention manual) can be accessed                                                                          | Lines 168 to 214 on Pages 6 to 8  |
| Outcomes                                                   | 14  | Prespecified primary and secondary outcomes, including the specific measurement variable (eg, systolic blood pressure), analysis metric (eg, change from baseline, final value, time to event), method of aggregation (eg, median, proportion), and time point for each outcome | Lines 216 to 279 on Pages 8 to 10 |
| Harms                                                      | 15  | How harms were defined and assessed (eg, systematically, non-systematically)                                                                                                                                                                                                    | Lines 207 to 208 on Page 8        |
| Sample size                                                | 16a | How sample size was determined, including all assumptions supporting the sample size calculation                                                                                                                                                                                | Lines 80 to 88 on Page 4          |
|                                                            | 16b | Explanation of any interim analyses and stopping guidelines                                                                                                                                                                                                                     | Lines 123 to 125 on Page 5        |
| Randomisation:<br>Sequence generation                      | 17a | Who generated the random allocation sequence and the method used                                                                                                                                                                                                                | Lines 113 to 114 on Page 5        |
|                                                            | 17b | Type of randomisation and details of any restriction (eg, stratification, blocking and block size)                                                                                                                                                                              | Lines 111 to 126 on Pages 5 to 6  |
|                                                            |     |                                                                                                                                                                                                                                                                                 | <b>Reported on page no.</b>       |
| Allocation concealment mechanism                           | 18  | Mechanism used to implement the random allocation sequence (eg, central computer/telephone; sequentially numbered, opaque, sealed containers), describing any steps to conceal the sequence until interventions were assigned                                                   | Lines 112 to 114 on Page 5        |
| Implementation                                             | 19  | Whether the personnel who enrolled and those who assigned participants to the interventions had access to the random allocation sequence                                                                                                                                        | NO                                |
| Blinding                                                   | 20a | Who was blinded after assignment to interventions (eg, participants, care providers, outcome assessors, data analysts)                                                                                                                                                          | Lines 112 to 114 on Page 5        |
|                                                            | 20b | If blinded, how blinding was achieved and description of the similarity of interventions                                                                                                                                                                                        | Lines 168 to 273 on Pages 6 to 8  |
| Statistical methods                                        | 21a | Statistical methods used to compare groups for primary and secondary outcomes, including harms                                                                                                                                                                                  | Lines 280 to 296 on Page 10       |
|                                                            | 21b | Definition of who is included in each analysis (eg, all randomised participants), and in which group                                                                                                                                                                            | Lines 111 to 126 on Page 5        |
|                                                            | 21c | How missing data were handled in the analysis                                                                                                                                                                                                                                   | Lines 266 to 278 on Page 9 to 10  |
|                                                            | 21d | Methods for any additional analyses (eg, subgroup and sensitivity analyses), distinguishing prespecified from post hoc                                                                                                                                                          | Lines 280 to 296 on Page 10       |
| <b>Results</b><br>Participant flow, including flow diagram | 22a | For each group, the numbers of participants who were randomly assigned, received intended intervention, and were analysed for the primary outcome                                                                                                                               | Lines 168 to 185 on Pages 5 to 6  |

|                                           |     |                                                                                                                                                                                                                                                                                                                                                                                                                                                          |                                    |
|-------------------------------------------|-----|----------------------------------------------------------------------------------------------------------------------------------------------------------------------------------------------------------------------------------------------------------------------------------------------------------------------------------------------------------------------------------------------------------------------------------------------------------|------------------------------------|
|                                           | 22b | For each group, losses and exclusions after randomisation, together with reasons                                                                                                                                                                                                                                                                                                                                                                         | Lines 123 to 125 on Pages 5 to 6   |
| Recruitment                               | 23a | Dates defining the periods of recruitment and follow-up for outcomes of benefits and harms                                                                                                                                                                                                                                                                                                                                                               | Lines 118 to 121 on Page 5         |
|                                           | 23b | If relevant, why the trial ended or was stopped                                                                                                                                                                                                                                                                                                                                                                                                          | Lines 123 to 125 on Page 5         |
| Intervention and comparator delivery      | 24a | Intervention and comparator as they were actually administered (eg, where appropriate, who delivered the intervention/comparator, how participants adhered, whether they were delivered as intended (fidelity))                                                                                                                                                                                                                                          | Lines 168 to 185 on Pages 6 to 8   |
|                                           | 24b | Concomitant care received during the trial for each group                                                                                                                                                                                                                                                                                                                                                                                                | Lines 168 to 185 on Pages 6 to 8   |
| Baseline data                             | 25  | A table showing baseline demographic and clinical characteristics for each group                                                                                                                                                                                                                                                                                                                                                                         | Lines 299 to 307 on Page 11        |
| Numbers analysed, outcomes and estimation | 26  | For each primary and secondary outcome, by group: <ul style="list-style-type: none"> <li>● the number of participants included in the analysis</li> <li>● the number of participants with available data at the outcome time point</li> <li>● result for each group, and the estimated effect size and its precision (such as 95% confidence interval)</li> <li>● for binary outcomes, presentation of both absolute and relative effect size</li> </ul> |                                    |
| Harms                                     | 27  | All harms or unintended events in each group                                                                                                                                                                                                                                                                                                                                                                                                             | None                               |
| Ancillary analyses                        | 28  | Any other analyses performed, including subgroup and sensitivity analyses, distinguishing pre-specified from post hoc                                                                                                                                                                                                                                                                                                                                    | Lines 308 to 382 on Pages 11 to 14 |
| <b>Discussion</b>                         |     |                                                                                                                                                                                                                                                                                                                                                                                                                                                          |                                    |
| Interpretation                            | 29  | Interpretation consistent with results, balancing benefits and harms, and considering other relevant evidence                                                                                                                                                                                                                                                                                                                                            | Lines 384 to 437 on Pages 15 to 16 |
| Limitations                               | 30  | Trial limitations, addressing sources of potential bias, imprecision, generalisability, and, if relevant, multiplicity of analyses                                                                                                                                                                                                                                                                                                                       | Lines 439 to 448 on Page 16        |

Citation: Hopewell S, Chan AW, Collins GS, Hróbjartsson A, Moher D, Schulz KF, et al. CONSORT 2025 Statement: updated guideline for reporting randomised trials. BMJ. 2025; 388:e081123. <https://dx.doi.org/10.1136/bmj-2024-081123>

© 2025 Hopewell et al. This is an Open Access article distributed under the terms of the Creative Commons Attribution License (<https://creativecommons.org/licenses/by/4.0/>), which permits unrestricted use, distribution, and reproduction in any medium, provided the original work is properly cited.

\*We strongly recommend reading this statement in conjunction with the CONSORT 2025 Explanation and Elaboration and/or the CONSORT 2025 Expanded Checklist for important clarifications on all the items. We also recommend reading relevant CONSORT extensions. See [www.consort-spirit.org](http://www.consort-spirit.org).
